# Supplementary material
Source: HighWire-hosted journal article supplement (https://fn.bmj.com/content/108/3/217)
Supplement: inline-supplementary-material-2 [file inline-supplementary-material-2.pdf]

## Prophylactic Surfactant Nebulization for the Early Aeration of the Preterm Lung –

### A Randomized Clinical Trial

### Supplementary Information

Vincent D. Gaertner<sup>1</sup>, Stefan Minocchieri<sup>2</sup>, Andreas D. Waldmann<sup>3</sup>, Tobias Mühlbacher<sup>1</sup>, Dirk Bassler<sup>1</sup>, Christoph M. Rügger<sup>1</sup> on behalf of the SUNSET study group

<sup>1</sup> Newborn Research Zurich, Department of Neonatology, University Hospital and University of Zurich, Switzerland

<sup>2</sup> Division of Neonatology, Cantonal Hospital Winterthur, 8401 Winterthur, Switzerland

<sup>3</sup> Department of Anesthesiology and Intensive Care Medicine, Rostock University Medical Center, Rostock, Germany

## Supplementary Methods

### Respiratory failure criteria

Failure of noninvasive respiratory support *in the delivery room* is defined by the presence of at least one of the following criteria:

- Bradycardia (<100 beats per minute) for  $\geq 30$  seconds despite NIPPV support
- No (adequate) air entry despite the use of non-invasive ventilation
- No breathing efforts after 3-5 minutes of NIPPV
- $FiO_2 > 0.4$  while on CPAP to reach preductal  $SpO_2$  values  $\geq 90\%$

During the first 24 hours of life, *failure of noninvasive respiratory support in the NICU* is defined by the presence of at least one of the following criteria:

- Sustained increase in  $FiO_2 > 0.4$  to keep  $SpO_2$  between 87-95%
- $> 3$  apneas requiring stimulation per hour
- Respiratory acidosis with a  $pH < 7.1$

If respiratory failure is due to insufficient oxygenation, infants  $\geq 28$  weeks gestation at birth first receive minimally invasive surfactant application (MIST), while infants  $< 28$  weeks gestation are primarily intubated.

### EIT data collection

A researcher not otherwise involved in resuscitation was present for each delivery to set up data collection devices before birth: A textile EIT belt was fastened at nipple level as soon as the infant reached the resuscitaire. The LuMon<sup>TM</sup> device (SenTec AG, Landquart, Switzerland) was used to record EIT data at a frame rate of 51 Hz. The EIT belt remained on the infant's

thorax for the initial 90 minutes or until the first chest X-ray was performed and was re-applied at nipple level at 6, 12 and 24 hours after birth. At pre-defined timepoints (every ten minutes from 10 to 90 minutes as well as 6, 12 and 24 hours after birth), 30 seconds with artefact-free tidal ventilation were identified and data were extracted using ibeX (version 1.1, SenTec AG, Landquart, Switzerland). Recordings were excluded from analysis if the infant had received (additional) intratracheal surfactant, either via MIST or via intubation. Infants were lying in supine position during all measurements. Thus, dorsal lung regions were considered gravity-dependent.[1,2] EIT data were analyzed using Matlab software (version 2019a, Mathworks, Nantick, MA, USA) and all parameters were assessed over all timepoints.

### EIT data preparation

First, data was prepared by projecting predefined anatomical lung regions based on the vendor-provided human model chest atlas into the EIT image, excluding EIT signals outside of these regions and normalizing the signal for body weight.[1–3]

Second, the net EIT signal at end-expiration (end-expiratory lung impedance; EELI) was isolated in arbitrary units (AU) to assess overall lung aeration. This was determined in four horizontal quantiles ranging from non-gravity-dependent to gravity-dependent ( $EELI_{NGD}$ ,  $EELI_{midNGD}$ ,  $EELI_{midGD}$ ,  $EELI_{GD}$ ) to assess regional aeration.[2] Finally, aeration homogeneity ratio ( $AHR$ ) and outer  $AHR$  ( $AHR_{outer}$ ) were calculated in both groups.[2] To calculate  $AHR$ s, signals in each quantile of regional aeration were first weighted to the known pixel contribution of each region to normalize for differences in lung size,[2,4] and then the non-gravity-dependent half of the EIT signal was divided by the gravity-dependent half (for  $AHR$ ) or the outermost non-gravity-dependent quantile was divided by the most gravity-dependent quantile (for  $AHR_{outer}$ ).[2] For both ratios, a value of 1 represents equal distribution of air and

a value  $<1$  or  $>1$  describes an aeration which favours the gravity-dependent or non-gravity-dependent lung, respectively.

Third, overall changes in ventilation including tidal volumes ( $V_T$ ), inspiratory to expiratory ratio, silent spaces (SS), the deviation from the ideal centre of ventilation (ideal minus actual centre of ventilation;  $CoV_{i-a}$ ) and the coefficient of variation (CV) were calculated at each of the pre-defined timepoints and compared between the two groups.[2,5] Silent spaces correspond to areas of the lung with little or no ventilation,[6] and were calculated in the gravity-dependent (GD) and non-gravity-dependent (NGD) hemithorax separately ( $SS_{GD}$  and  $SS_{NGD}$ , respectively). The  $CoV_{i-a}$  is an indicator of global ventilation distribution (e.g. gravity-dependent vs gravity-non-dependent and right vs left). SS and  $CoV_{i-a}$  are percentages and thus, they were not normalized for body weight. Finally, the standard deviation (SD) of impedance changes in all pixels was divided by the mean value of impedance to calculate the coefficient of variation (CV).[2,7] The CV correlates with ventilation homogeneity and lower values indicate improved homogeneity.

## SUPPLEMENTARY TABLES

| Variable                                                  | Surfactant nebulization<br>(N=16) | Standard care<br>(N=16) | p-value      | P <sub>adj</sub> |
|-----------------------------------------------------------|-----------------------------------|-------------------------|--------------|------------------|
| <i>A) ΔEELI over time [AU/kg]</i>                         |                                   |                         |              |                  |
| 10 min                                                    | 29 (23 – 54)                      | 25 (14 – 37)            | 0.36         | 0.39             |
| 20 min                                                    | 28 (11 – 67)                      | 21 (10 – 32)            | 0.49         | 0.49             |
| 30 min                                                    | 25 (7 – 62)                       | 10 (0 – 26)             | 0.21         | 0.33             |
| 40 min                                                    | 23 (2 – 49)                       | 10 (0 – 18)             | 0.28         | 0.36             |
| 50 min                                                    | 26 (-1 – 49)                      | 7 (-12 – 25)            | 0.22         | 0.33             |
| 60 min                                                    | 15 (-9 – 55)                      | 6 (-11 – 11)            | 0.30         | 0.36             |
| 70 min                                                    | 28 (0 – 55)                       | 4 (-16 – 15)            | 0.09         | 0.24             |
| 80 min                                                    | 34 (8 – 60)                       | 4 (-8 – 16)             | 0.10         | 0.24             |
| 90 min                                                    | 35 (30 – 63)                      | 1 (-3 – 6)              | 0.19         | 0.33             |
| 6 hrs                                                     | 73 (22 – 111)                     | 28 (-4 – 44)            | <b>0.04</b>  | 0.24             |
| 12 hrs                                                    | 93 (83 – 137)                     | 39 (15 – 78)            | <b>0.009</b> | 0.108            |
| 24 hrs                                                    | 86 (50 – 123)                     | 45 (21 – 77)            | 0.08         | 0.24             |
| <i>B) Mean airway pressure over time [mbar]</i>           |                                   |                         |              |                  |
| 10 min                                                    | 10.8 (8.0 – 12.2)                 | 8.0 (8.0 – 12.0)        | 0.56         | 0.83             |
| 20 min                                                    | 9.1 (8.0 – 11.6)                  | 8.0 (7.8 – 8.5)         | 0.14         | 0.83             |
| 30 min                                                    | 8.0 (8.0 – 8.0)                   | 8.0 (7.8 – 8.0)         | 0.37         | 0.83             |
| 40 min                                                    | 8.0 (8.0 – 8.0)                   | 7.5 (7.0 – 8.0)         | 0.23         | 0.83             |
| 50 min                                                    | 8.0 (8.0 – 8.0)                   | 7.5 (7.0 – 8.3)         | 0.28         | 0.83             |
| 60 min                                                    | 8.0 (7.5 – 8.7)                   | 7.0 (7.0 – 8.0)         | 0.19         | 0.83             |
| 70 min                                                    | 8.0 (7.0 – 8.0)                   | 7.0 (7.0 – 8.0)         | 0.69         | 0.83             |
| 80 min                                                    | 8.0 (7.0 – 8.0)                   | 7.0 (7.0 – 8.0)         | 0.56         | 0.83             |
| 90 min                                                    | 8.0 (7.0 – 8.0)                   | 7.0 (7.0 – 8.0)         | 0.57         | 0.83             |
| 6 hrs                                                     | 6.5 (6.0 – 7.3)                   | 7.0 (6.0 – 7.0)         | 0.98         | 0.98             |
| 12 hrs                                                    | 6.0 (5.5 – 6.0)                   | 6.0 (5.5 – 7.0)         | 0.83         | 0.91             |
| 24 hrs                                                    | 5.0 (5.0 – 6.0)                   | 6.0 (5.0 – 6.0)         | 0.67         | 0.83             |
| <i>C) SpO<sub>2</sub>/FiO<sub>2</sub>-ratio over time</i> |                                   |                         |              |                  |
| 10 min                                                    | 259 (171 – 345)                   | 341 (260 – 396)         | 0.05         | 0.30             |
| 20 min                                                    | 300 (240 – 342)                   | 378 (339 – 410)         | <b>0.04</b>  | 0.30             |
| 30 min                                                    | 382 (302 – 432)                   | 392 (324 – 431)         | 0.66         | 0.88             |
| 40 min                                                    | 390 (355 – 448)                   | 430 (344 – 457)         | 0.51         | 0.88             |
| 50 min                                                    | 438 (317 – 455)                   | 420 (347 – 463)         | 0.66         | 0.88             |
| 60 min                                                    | 433 (305 – 455)                   | 432 (351 – 458)         | 0.58         | 0.88             |
| 70 min                                                    | 422 (335 – 461)                   | 438 (340 – 462)         | 0.85         | 0.92             |
| 80 min                                                    | 433 (372 – 466)                   | 434 (334 – 457)         | 0.66         | 0.88             |
| 90 min                                                    | 452 (351 – 457)                   | 426 (372 – 467)         | 0.87         | 0.92             |
| 6 hrs                                                     | 453 (423 – 462)                   | 428 (398 – 450)         | 0.19         | 0.76             |

|                                      |                 |                 |      |      |
|--------------------------------------|-----------------|-----------------|------|------|
| 12 hrs                               | 457 (386 – 467) | 448 (427 – 462) | 0.92 | 0.92 |
| 24 hrs                               | 462 (387 – 467) | 448 (417 – 462) | 0.54 | 0.88 |
| <b>D) Heart rate over time [bpm]</b> |                 |                 |      |      |
| 10 min                               | 145 (140 – 163) | 143 (140 – 155) | 0.69 | 0.73 |
| 20 min                               | 158 (153 – 179) | 159 (150 – 169) | 0.57 | 0.73 |
| 30 min                               | 171 (153 – 177) | 160 (157 – 173) | 0.73 | 0.73 |
| 40 min                               | 167 (155 – 173) | 156 (148 – 171) | 0.24 | 0.73 |
| 50 min                               | 163 (152 – 170) | 152 (150 – 165) | 0.28 | 0.73 |
| 60 min                               | 158 (148 – 169) | 149 (145 – 161) | 0.43 | 0.73 |
| 70 min                               | 154 (151 – 167) | 149 (142 – 159) | 0.16 | 0.73 |
| 80 min                               | 158 (149 – 162) | 152 (141 – 162) | 0.47 | 0.73 |
| 90 min                               | 154 (148 – 162) | 150 (142 – 160) | 0.37 | 0.73 |
| 6 hrs                                | 150 (136 – 156) | 147 (142 – 153) | 0.64 | 0.73 |
| 12 hrs                               | 147 (137 – 154) | 147 (135 – 150) | 0.66 | 0.73 |
| 24 hrs                               | 142 (137 – 155) | 144 (139 – 158) | 0.58 | 0.73 |

**Supplementary Table S1. Changes in end-expiratory lung impedance (A), mean airway pressure (B), SpO<sub>2</sub>/FiO<sub>2</sub>-ratio (C) and heart rate (D) over time.** Analysis for each timepoint is based only on infants who are non-invasively ventilated at the respective timepoint (see Figure 2 for exact numbers). NB: set mean airway pressure is shown. *Abbreviations:*  $p_{adj}$  = adjusted p-value using the Bonferroni-Holm method;  $\Delta$ EELI = changes in end-expiratory lung impedance, SpO<sub>2</sub> = peripheral oxygen saturation, FiO<sub>2</sub> = fraction of inspired oxygen.

| Variable                                          | Surfactant nebulization<br>(N=16) | Standard care<br>(N=16) | p-value      | P <sub>adj</sub> |
|---------------------------------------------------|-----------------------------------|-------------------------|--------------|------------------|
| <i>A) ΔEELI non-gravity-dependent [AU/kg]</i>     |                                   |                         |              |                  |
| 10 min                                            | 1.7 (0.5 to 2.56)                 | 2.11 (0.43 to 4.06)     | 0.67         | 0.95             |
| 20 min                                            | 2.49 (0.51 to 5.13)               | 1.58 (0.21 to 4.08)     | 0.49         | 0.88             |
| 30 min                                            | 1.35 (0.38 to 4.1)                | 0.42 (-0.4 to 2.3)      | 0.30         | 0.85             |
| 40 min                                            | 0.49 (-0.28 to 3.03)              | 0.82 (-0.44 to 1.99)    | 0.92         | 1                |
| 50 min                                            | 3.12 (0.01 to 4.12)               | 0.88 (-0.63 to 3.41)    | 0.49         | 0.88             |
| 60 min                                            | 1.77 (-0.33 to 4.76)              | 0.39 (-1.38 to 3.34)    | 0.42         | 0.85             |
| 70 min                                            | 2.25 (1 to 4.42)                  | 1.16 (0.15 to 3.24)     | 0.42         | 0.85             |
| 80 min                                            | 2.23 (1.02 to 3.81)               | 1.24 (-1.31 to 2.22)    | 0.29         | 0.85             |
| 90 min                                            | 1.79 (0.72 to 3.27)               | 0.03 (-0.8 to 2.08)     | 0.56         | 0.94             |
| 6 hrs                                             | 1.27 (-0.15 to 6)                 | 2.04 (0.1 to 3.2)       | 0.98         | 1                |
| 12 hrs                                            | 5.93 (2.75 to 11.27)              | 2.75 (1.3 to 4.6)       | 0.10         | 0.61             |
| 24 hrs                                            | 3.92 (0.49 to 13.23)              | 3.43 (-0.82 to 3.78)    | 0.30         | 0.85             |
| <i>B) ΔEELI mid-non-gravity-dependent [AU/kg]</i> |                                   |                         |              |                  |
| 10 min                                            | 8.27 (4.32 to 12.99)              | 9.73 (0.62 to 13.81)    | 0.99         | 1                |
| 20 min                                            | 7.04 (-1.2 to 22.61)              | 5.31 (1.59 to 10.95)    | 0.64         | 0.95             |
| 30 min                                            | 4.25 (-6.96 to 13.31)             | 5.31 (-1.71 to 10.11)   | 0.93         | 1                |
| 40 min                                            | 7.73 (-0.29 to 11.17)             | 2.58 (-2.68 to 6.11)    | 0.36         | 0.85             |
| 50 min                                            | 7.45 (-8.13 to 18.73)             | 2.65 (-3.05 to 9.93)    | 0.49         | 0.88             |
| 60 min                                            | 3.93 (-2.01 to 16.46)             | 1.24 (-8.57 to 7.15)    | 0.20         | 0.84             |
| 70 min                                            | 9.46 (0.26 to 21.12)              | 2.62 (-6.96 to 6.91)    | 0.14         | 0.70             |
| 80 min                                            | 12.06 (4.33 to 23.97)             | 2.78 (-4.74 to 8.19)    | 0.10         | 0.61             |
| 90 min                                            | 17.03 (7.73 to 21.36)             | 1.04 (-0.65 to 5.47)    | 0.29         | 0.85             |
| 6 hrs                                             | 25.03 (7.08 to 43.78)             | 7.73 (-14.76 to 20.35)  | 0.08         | 0.58             |
| 12 hrs                                            | 31.24 (25.08 to 56.1)             | 10.4 (-2.83 to 25.07)   | <b>0.02</b>  | 0.41             |
| 24 hrs                                            | 32.17 (10.85 to 47.12)            | 21.44 (12.36 to 23.1)   | 0.12         | 0.64             |
| <i>C) ΔEELI mid-gravity-dependent [AU/kg]</i>     |                                   |                         |              |                  |
| 10 min                                            | 16.24 (10.76 to 22.24)            | 16.86 (4.3 to 26.04)    | 0.87         | 1                |
| 20 min                                            | 25.63 (10.99 to 32.22)            | 16.5 (6.85 to 23.67)    | 0.24         | 0.85             |
| 30 min                                            | 12.75 (-2.27 to 31.83)            | 14.38 (-0.42 to 21.01)  | 0.42         | 0.85             |
| 40 min                                            | 9.66 (-3.32 to 22.08)             | 7.85 (0.26 to 12.78)    | 0.49         | 0.88             |
| 50 min                                            | 11.72 (-5.07 to 26.85)            | 6.97 (-9.1 to 13.19)    | 0.36         | 0.85             |
| 60 min                                            | 3.55 (-8.12 to 16.94)             | 2.97 (-6.06 to 13.32)   | 0.68         | 0.95             |
| 70 min                                            | 10.98 (0.67 to 18.64)             | 3.2 (-15.17 to 12.4)    | 0.23         | 0.85             |
| 80 min                                            | 13.24 (4.68 to 25.29)             | 2.73 (-17.07 to 13.62)  | 0.18         | 0.77             |
| 90 min                                            | 24.38 (-3.28 to 41.52)            | 5.3 (-11.74 to 7.69)    | 0.41         | 0.85             |
| 6 hrs                                             | 57.11 (30.91 to 77.39)            | 16.63 (-1.92 to 27.26)  | <b>0.003</b> | 0.39             |
| 12 hrs                                            | 62.3 (50.17 to 93.01)             | 25.14 (4.11 to 45.65)   | <b>0.008</b> | 0.39             |

|                                                             |                        |                       |              |      |
|-------------------------------------------------------------|------------------------|-----------------------|--------------|------|
| 24 hrs                                                      | 53.43 (32.19 to 73.34) | 26.03 (-1.41 to 53.6) | 0.13         | 0.69 |
| <i>D) <math>\Delta</math>EELI gravity-dependent [AU/kg]</i> |                        |                       |              |      |
| 10 min                                                      | 0.71 (-0.45 to 1.44)   | 0.85 (-0.5 to 1.71)   | 0.75         | 0.98 |
| 20 min                                                      | 0.9 (0.26 to 1.49)     | 0.85 (0.04 to 1.63)   | 0.81         | 1    |
| 30 min                                                      | 0.7 (0.06 to 1.7)      | 0.6 (-0.16 to 1.37)   | 0.64         | 0.95 |
| 40 min                                                      | 0.54 (-1.68 to 0.91)   | 0.67 (-0.31 to 1.06)  | 0.68         | 0.95 |
| 50 min                                                      | 0.5 (-0.2 to 1.19)     | 0.57 (-0.42 to 0.9)   | 0.68         | 0.95 |
| 60 min                                                      | -0.57 (-1.08 to 0.47)  | 0.2 (-0.98 to 0.95)   | 0.71         | 0.97 |
| 70 min                                                      | -0.2 (-0.56 to 1.12)   | 0.23 (-0.2 to 0.57)   | 0.97         | 1    |
| 80 min                                                      | 0.81 (-0.69 to 1.22)   | -0.17 (-0.37 to 0.97) | 0.93         | 1    |
| 90 min                                                      | 1.94 (-1.21 to 2.19)   | 0.22 (-1.65 to 0.35)  | 0.41         | 0.85 |
| 6 hrs                                                       | 3.18 (1.53 to 5.15)    | 0.58 (-1.32 to 1.63)  | <b>0.005</b> | 0.39 |
| 12 hrs                                                      | 4.03 (2.39 to 5.47)    | 1.91 (0.51 to 2.91)   | <b>0.027</b> | 0.41 |
| 24 hrs                                                      | 3.27 (1.94 to 4.71)    | 1.52 (0.21 to 4.19)   | 0.17         | 0.76 |
| <i>E) Aeration Homogeneity Ratio</i>                        |                        |                       |              |      |
| 10 min                                                      | 0.68 (0.57 to 0.84)    | 0.69 (0.6 to 0.87)    | 0.72         | 0.97 |
| 20 min                                                      | 0.69 (0.56 to 0.85)    | 0.68 (0.59 to 0.88)   | 0.72         | 0.97 |
| 30 min                                                      | 0.69 (0.57 to 0.85)    | 0.7 (0.59 to 0.86)    | 0.75         | 0.98 |
| 40 min                                                      | 0.63 (0.57 to 0.83)    | 0.7 (0.59 to 0.88)    | 0.60         | 0.95 |
| 50 min                                                      | 0.63 (0.58 to 0.85)    | 0.71 (0.59 to 0.89)   | 0.60         | 0.95 |
| 60 min                                                      | 0.63 (0.58 to 0.85)    | 0.69 (0.59 to 0.88)   | 0.65         | 0.95 |
| 70 min                                                      | 0.7 (0.58 to 0.85)     | 0.69 (0.59 to 0.96)   | 0.63         | 0.95 |
| 80 min                                                      | 0.62 (0.54 to 0.86)    | 0.68 (0.59 to 0.83)   | 0.66         | 0.95 |
| 90 min                                                      | 0.8 (0.62 to 0.88)     | 0.61 (0.54 to 0.76)   | 0.73         | 0.97 |
| 6 hrs                                                       | 0.72 (0.58 to 0.82)    | 0.71 (0.58 to 0.86)   | 0.77         | 0.99 |
| 12 hrs                                                      | 0.79 (0.53 to 0.86)    | 0.71 (0.59 to 0.76)   | 0.84         | 1    |
| 24 hrs                                                      | 0.82 (0.56 to 0.85)    | 0.68 (0.57 to 0.79)   | 0.95         | 1    |

**Supplementary Table S2. Changes in end-expiratory lung impedance across 4 horizontal slices (A-D) and Aeration Homogeneity Ratio (E) over time.** Analysis for each timepoint is based only on infants who are non-invasively ventilated at the respective timepoint (see Figure 2 for exact numbers). *Abbreviations:*  $\Delta$ EELI = changes in end-expiratory lung impedance,  $p_{adj}$  = adjusted p-value using the Bonferroni-Holm method.



| Variable                                                                         | Surfactant nebulization<br>(N=16) | Standard care<br>(N=16) | p-value      | P <sub>adj</sub> |
|----------------------------------------------------------------------------------|-----------------------------------|-------------------------|--------------|------------------|
| <i>A) Deviation from the ideal center of ventilation (right to left) [%]</i>     |                                   |                         |              |                  |
| 10 min                                                                           | 5.27 (-1.86 to 7.53)              | 5.54 (-0.42 to 8.2)     | 0.93         | 1                |
| 20 min                                                                           | 6.05 (-1.04 to 8.12)              | 4.19 (0.03 to 9.97)     | 0.81         | 1                |
| 30 min                                                                           | 3.71 (-1.29 to 7.34)              | 9.17 (6.3 to 11.83)     | <b>0.019</b> | 0.411            |
| 40 min                                                                           | 6.36 (-0.75 to 7.53)              | 8.52 (6.94 to 10.65)    | <b>0.024</b> | 0.411            |
| 50 min                                                                           | 4.92 (-6.53 to 9.06)              | 8.41 (6.1 to 9.77)      | 0.078        | 0.582            |
| 60 min                                                                           | 4.23 (-5.04 to 10.02)             | 10.23 (7.24 to 12.08)   | <b>0.049</b> | 0.57             |
| 70 min                                                                           | 2.17 (0.33 to 5.44)               | 9.77 (7.06 to 11.13)    | <b>0.021</b> | 0.411            |
| 80 min                                                                           | 3.54 (1.02 to 5.11)               | 8.65 (1.59 to 11.76)    | 0.29         | 0.8504           |
| 90 min                                                                           | 3.51 (3.36 to 9.11)               | 4.32 (-8.38 to 12.25)   | 0.90         | 1                |
| 6 hrs                                                                            | 5.02 (0.75 to 10.81)              | 5.71 (-0.21 to 10.43)   | 0.95         | 1                |
| 12 hrs                                                                           | 4.23 (2.26 to 7.6)                | 4.13 (-2.19 to 7.29)    | 0.47         | 0.883            |
| 24 hrs                                                                           | 5.16 (-2.52 to 6.69)              | 8.09 (3.67 to 10.76)    | 0.30         | 0.8504           |
| <i>B) Deviation from the ideal center of ventilation (ventral to dorsal) [%]</i> |                                   |                         |              |                  |
| 10 min                                                                           | -3.11 (-3.86 to -0.33)            | -3.04 (-5.49 to -2.06)  | 0.49         | 0.88             |
| 20 min                                                                           | -2.46 (-6.31 to 0.77)             | -4.75 (-6.02 to -1.76)  | 0.34         | 0.85             |
| 30 min                                                                           | -2.33 (-5.41 to -0.31)            | -1.66 (-4.05 to -0.37)  | 0.78         | 1                |
| 40 min                                                                           | -3.94 (-7.22 to -1.68)            | -1.73 (-3.17 to 0.47)   | 0.07         | 0.58             |
| 50 min                                                                           | -3.86 (-7.18 to -1.25)            | -1.1 (-2.4 to -0.48)    | 0.10         | 0.61             |
| 60 min                                                                           | -4.24 (-6.56 to -1.5)             | -2.22 (-5.39 to -0.58)  | 0.34         | 0.85             |
| 70 min                                                                           | -4.23 (-7.97 to -2.87)            | -2.07 (-2.42 to 0.33)   | <b>0.043</b> | 0.53             |
| 80 min                                                                           | -5.57 (-7.54 to -3.72)            | -1.92 (-4.48 to -1.79)  | 0.09         | 0.58             |
| 90 min                                                                           | -7.49 (-7.62 to -5.12)            | -2.49 (-3.93 to -1.29)  | 0.06         | 0.58             |
| 6 hrs                                                                            | -5.86 (-8.92 to -4)               | -5.37 (-6.54 to -3.37)  | 0.42         | 0.85             |
| 12 hrs                                                                           | -4.39 (-8.8 to -2.91)             | -4.49 (-5.3 to -2.04)   | 0.68         | 0.95             |
| 24 hrs                                                                           | -5.28 (-6.54 to -4)               | -3.1 (-4.22 to -2.35)   | <b>0.035</b> | 0.48             |
| <i>C) Coefficient of variation</i>                                               |                                   |                         |              |                  |
| 10 min                                                                           | 0.85 (0.67 to 1)                  | 0.76 (0.66 to 0.89)     | 0.49         | 0.88             |
| 20 min                                                                           | 0.82 (0.74 to 1.08)               | 0.79 (0.64 to 1.03)     | 0.64         | 0.95             |
| 30 min                                                                           | 0.82 (0.59 to 1.04)               | 0.74 (0.68 to 0.85)     | 0.64         | 0.95             |
| 40 min                                                                           | 0.78 (0.64 to 1)                  | 0.69 (0.64 to 0.76)     | 0.30         | 0.85             |
| 50 min                                                                           | 0.72 (0.6 to 1.03)                | 0.73 (0.61 to 0.88)     | 0.68         | 0.95             |
| 60 min                                                                           | 0.75 (0.64 to 0.86)               | 0.71 (0.61 to 0.77)     | 0.30         | 0.85             |
| 70 min                                                                           | 0.83 (0.66 to 0.96)               | 0.7 (0.6 to 0.91)       | 0.58         | 0.95             |
| 80 min                                                                           | 0.76 (0.61 to 0.92)               | 0.7 (0.64 to 0.85)      | 0.86         | 1                |
| 90 min                                                                           | 0.7 (0.69 to 0.72)                | 0.69 (0.56 to 0.97)     | 0.90         | 1                |
| 6 hrs                                                                            | 0.7 (0.61 to 0.81)                | 0.63 (0.61 to 0.75)     | 0.51         | 0.89             |
| 12 hrs                                                                           | 0.68 (0.67 to 0.73)               | 0.64 (0.56 to 0.69)     | 0.08         | 0.58             |

|                                                   |                      |                     |              |      |
|---------------------------------------------------|----------------------|---------------------|--------------|------|
| 24 hrs                                            | 0.66 (0.61 to 0.81)  | 0.62 (0.6 to 0.72)  | 0.36         | 0.85 |
| <i>D) Gravity-dependent silent spaces [%]</i>     |                      |                     |              |      |
| 10 min                                            | 1.75 (0.96 to 3.48)  | 1.03 (0.49 to 3.35) | 0.38         | 0.85 |
| 20 min                                            | 1.81 (0.44 to 3.44)  | 0.81 (0.55 to 2.54) | 0.42         | 0.85 |
| 30 min                                            | 1.43 (0.48 to 2.49)  | 1.63 (0.54 to 3.83) | 0.61         | 0.95 |
| 40 min                                            | 1.3 (0.3 to 1.94)    | 1.62 (0.54 to 2.83) | 0.42         | 0.85 |
| 50 min                                            | 1.29 (0.4 to 3.42)   | 1.78 (1.06 to 3.62) | 0.27         | 0.85 |
| 60 min                                            | 0.92 (0.43 to 1.52)  | 1.52 (0.7 to 3.44)  | 0.16         | 0.75 |
| 70 min                                            | 0.67 (0.41 to 1.07)  | 0.89 (0.65 to 1.7)  | 0.53         | 0.92 |
| 80 min                                            | 0.54 (0.27 to 2.55)  | 1.51 (0.95 to 3.21) | 0.28         | 0.85 |
| 90 min                                            | 0.03 (0 to 1.06)     | 3.99 (0.54 to 7.49) | 0.18         | 0.77 |
| 6 hrs                                             | 0.95 (0.7 to 1.44)   | 0.63 (0.52 to 2.07) | 1            | 1    |
| 12 hrs                                            | 0.61 (0.21 to 1.47)  | 0.55 (0.45 to 1.65) | 1            | 1    |
| 24 hrs                                            | 0.57 (0.26 to 2.75)  | 1.1 (0.61 to 1.35)  | 0.54         | 0.92 |
| <i>E) Non-gravity-dependent silent spaces [%]</i> |                      |                     |              |      |
| 10 min                                            | 6.48 (4.55 to 7.93)  | 7.35 (5.48 to 8.45) | 0.32         | 0.85 |
| 20 min                                            | 6.25 (3.62 to 8.61)  | 7.65 (6.08 to 8.6)  | 0.22         | 0.85 |
| 30 min                                            | 6 (4.84 to 7.71)     | 6.53 (5.05 to 9.35) | 0.51         | 0.90 |
| 40 min                                            | 5.64 (4.99 to 7.86)  | 5.58 (4.68 to 7.78) | 1            | 1    |
| 50 min                                            | 6.39 (4.39 to 8.44)  | 5.81 (5.14 to 7.1)  | 0.83         | 1    |
| 60 min                                            | 6.3 (5.12 to 8.05)   | 6.32 (4.95 to 8.48) | 0.98         | 1    |
| 70 min                                            | 5.56 (4.67 to 6.75)  | 6.39 (5.86 to 7.29) | 0.35         | 0.85 |
| 80 min                                            | 7.83 (6.62 to 8.82)  | 6.62 (4.9 to 8.86)  | 0.43         | 0.85 |
| 90 min                                            | 7.53 (6.16 to 8.53)  | 7.45 (6.22 to 8.51) | 0.90         | 1    |
| 6 hrs                                             | 9.6 (7.85 to 11.94)  | 8.09 (6.34 to 9.35) | 0.07         | 0.58 |
| 12 hrs                                            | 9.18 (7.36 to 12.05) | 6.71 (5.36 to 7.98) | <b>0.027</b> | 0.41 |
| 24 hrs                                            | 8.38 (7.33 to 9.4)   | 6.24 (5.02 to 8.97) | 0.15         | 0.73 |

**Supplementary Table S3. Changes in ventilation EIT parameters over time.** Analysis for each timepoint is based only on infants who are non-invasively ventilated at the respective timepoint (see Figure 2 for exact numbers). *Abbreviations:*  $p_{adj}$  = adjusted p-value using the Bonferroni-Holm method.

| Variable    | Surfactant nebulization (N=16) | Standard care (N=16) | p-value | P <sub>adj</sub> |
|-------------|--------------------------------|----------------------|---------|------------------|
| VTe [ml/kg] |                                |                      |         |                  |
| 10 min      | 6.3 (5.9 – 7.5)                | 5.5 (4.4 – 7.8)      | 0.25    | 1                |
| 20 min      | 5.9 (4.5 – 7.1)                | 5.2 (4.4 – 7.5)      | 1       | 1                |
| 30 min      | 5.7 (4.6 – 6.4)                | 6.5 (4.4 – 7.5)      | 0.69    | 1                |
| Leak [%]    |                                |                      |         |                  |
| 10 min      | 3 (0 – 12)                     | 3 (0 – 10)           | 0.98    | 1                |
| 20 min      | 8 (5 – 11)                     | 5 (4 – 10)           | 0.42    | 1                |
| 30 min      | 4 (2 – 7)                      | 2 (0 – 7)            | 0.54    | 1                |
| Ti [sec]    |                                |                      |         |                  |
| 10 min      | 0.3 (0.3 – 0.32)               | 0.31 (0.3 – 0.34)    | 0.76    | 1                |
| 20 min      | 0.3 (0.3 – 0.34)               | 0.31 (0.29 – 0.38)   | 0.69    | 1                |
| 30 min      | 0.34 (0.3 – 0.42)              | 0.35 (0.31 – 0.4)    | 0.95    | 1                |
| Ti/Te-ratio |                                |                      |         |                  |
| 10 min      | 0.43 (0.41 – 0.45)             | 0.43 (0.36 – 0.45)   | 0.70    | 1                |
| 20 min      | 0.43 (0.43 – 0.44)             | 0.41 (0.3 – 0.5)     | 0.59    | 1                |
| 30 min      | 0.43 (0.43 – 0.61)             | 0.44 (0.38 – 0.64)   | 1       | 1                |
| RR [1/min]  |                                |                      |         |                  |
| 10 min      | 66 (57 – 85)                   | 71 (48 – 78)         | 0.88    | 1                |
| 20 min      | 61 (56 – 75)                   | 56 (54 – 63)         | 0.22    | 1                |
| 30 min      | 61 (57 – 67)                   | 60 (50 – 92)         | 0.83    | 1                |

**Supplementary Table S4. Changes in respiratory function data (N=32).** Abbreviations:  $p_{adj}$  = adjusted p-value using the Bonferroni-Holm method; VTe = expired tidal volume, Ti = inspiratory time, Ti/Te-ratio = ratio of inspiratory and expiratory time, RR = respiratory rate, MAP = mean airway pressure.

## SUPPLEMENTARY FIGURES

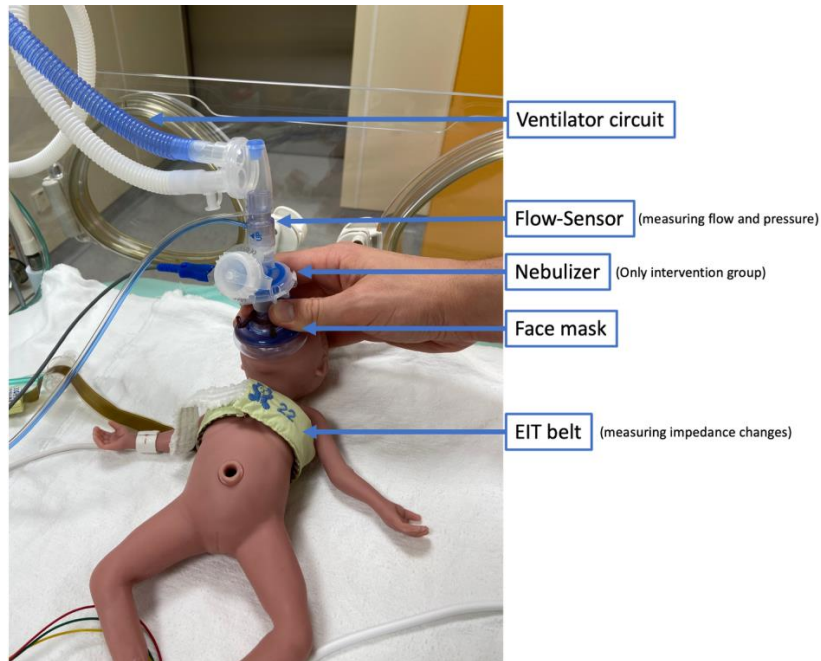

**Supplementary Figure S1.** Setup of the devices in the intervention group. The control group had the same setup except the nebulizer.

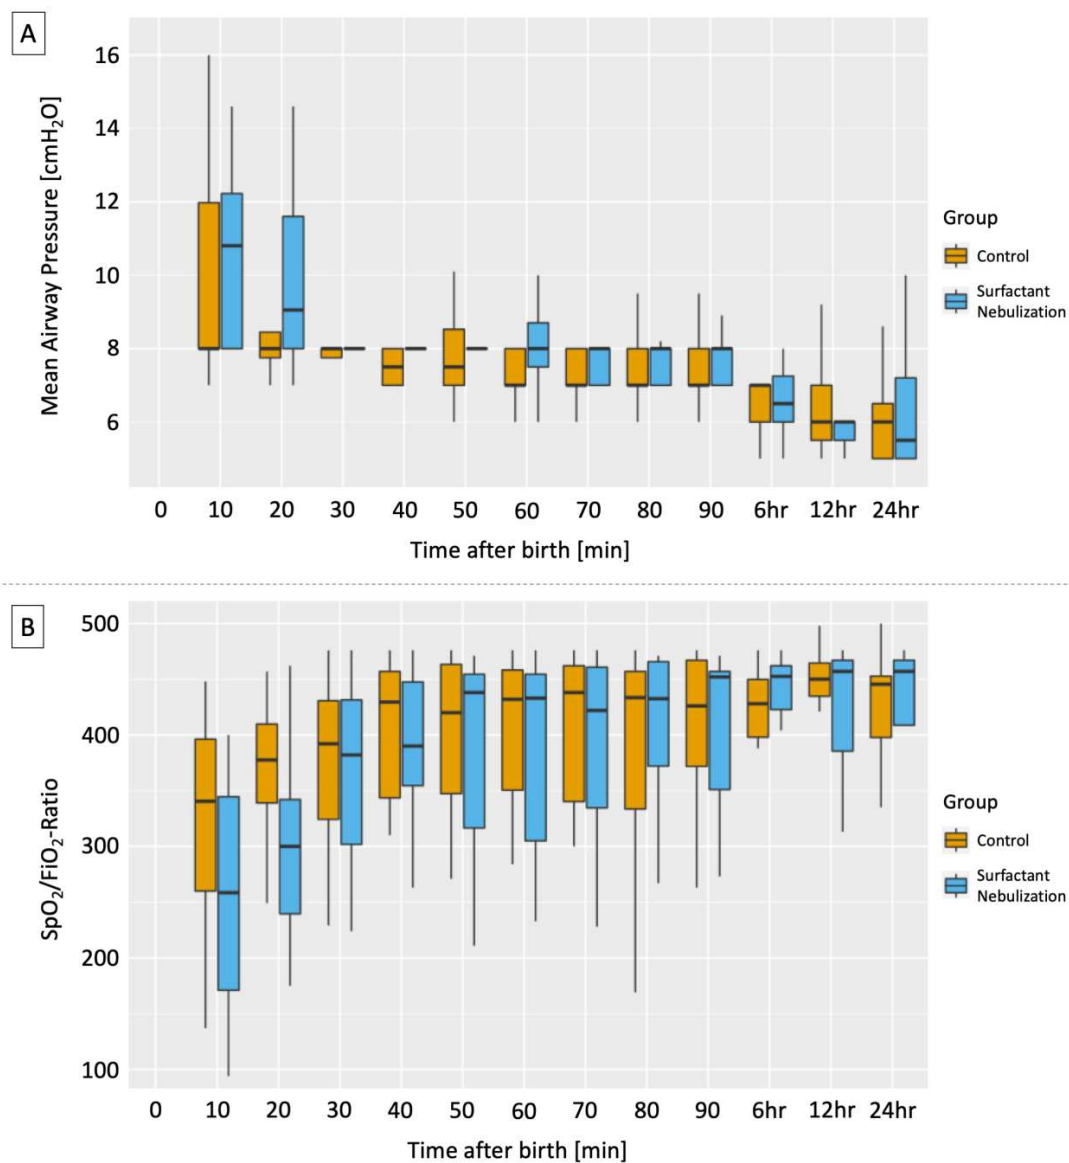

**Supplementary Figure S2. Mean Airway pressure (A) and SpO<sub>2</sub>/FiO<sub>2</sub>-ratio (B) over the first 24 hours.** The corresponding exact values can be found in Supplementary Table S1. *Abbreviations:* cmH<sub>2</sub>O = centimeters of water, SpO<sub>2</sub> = peripheral oxygen saturation, FiO<sub>2</sub> = fraction of inspired oxygen, min = minutes, hr = hours, SN = surfactant nebulization.

## References

1. Gaertner VD, Waldmann AD, Davis PG, Bassler D, Springer L, Thomson J, et al. Transmission of Oscillatory Volumes into the Preterm Lung during Noninvasive High-Frequency Ventilation. *Am J Respir Crit Care Med*. 2021;203(8):998–1005.
2. Gaertner VD, Waldmann AD, Davis PG, Bassler D, Springer L, Thomson J, et al. Lung volume distribution in preterm infants on non-invasive high-frequency ventilation. *Arch Dis Child Fetal Neonatal Ed*. 2022 Jan 31;
3. Tingay DG, Waldmann AD, Frerichs I, Ranganathan S, Adler A. Electrical Impedance Tomography Can Identify Ventilation and Perfusion Defects: A Neonatal Case. *Am J Respir Crit Care Med*. 2019 Feb 1;199(3):384–6.
4. Tingay D, Rajapaksa A, Zonneveld C, Black D, Perkins E, Adler A, et al. Spatiotemporal Aeration and Lung Injury Patterns Are Influenced by the First Inflation Strategy at Birth. *Am J Respir Cell Mol Biol*. 2016;54(2):263–72.
5. Frerichs I, Amato MBP, van Kaam AH, Tingay DG, Zhao Z, Grychtol B, et al. Chest electrical impedance tomography examination, data analysis, terminology, clinical use and recommendations: consensus statement of the TRanslational EIT developmeNt stuDy group. *Thorax*. 2017 Jan;72(1):83–93.
6. Spadaro S, Mauri T, Böhm SH, Scaramuzza G, Turrini C, Waldmann AD, et al. Variation of poorly ventilated lung units (silent spaces) measured by electrical impedance tomography to dynamically assess recruitment. *Crit Care*. 2018;22(1):26.
7. Becher T, Vogt B, Kott M, Schädler D, Weiler N, Frerichs I. Functional Regions of Interest in Electrical Impedance Tomography: A Secondary Analysis of Two Clinical Studies. *PLoS One*. 2016;11(3):e0152267.
